# Supplementary material for: Ectopic expression of PLC‐β2 in non‐invasive breast tumor cells plays a protective role against malignant progression and is correlated with the deregulation of miR‐146a
Source: PubMed Central journal article supplement — Mol Carcinog. 2019 Jan 16;58(5):708–21. doi: 10.1002/mc.22964 (PMC6590318; doi:10.1002/mc.22964), 2019-01-16
Supplement: MC-58-708-s001.pdf [file MC-58-708-s001.pdf]

**A**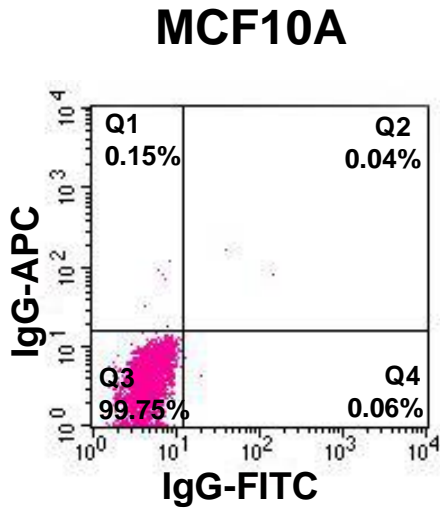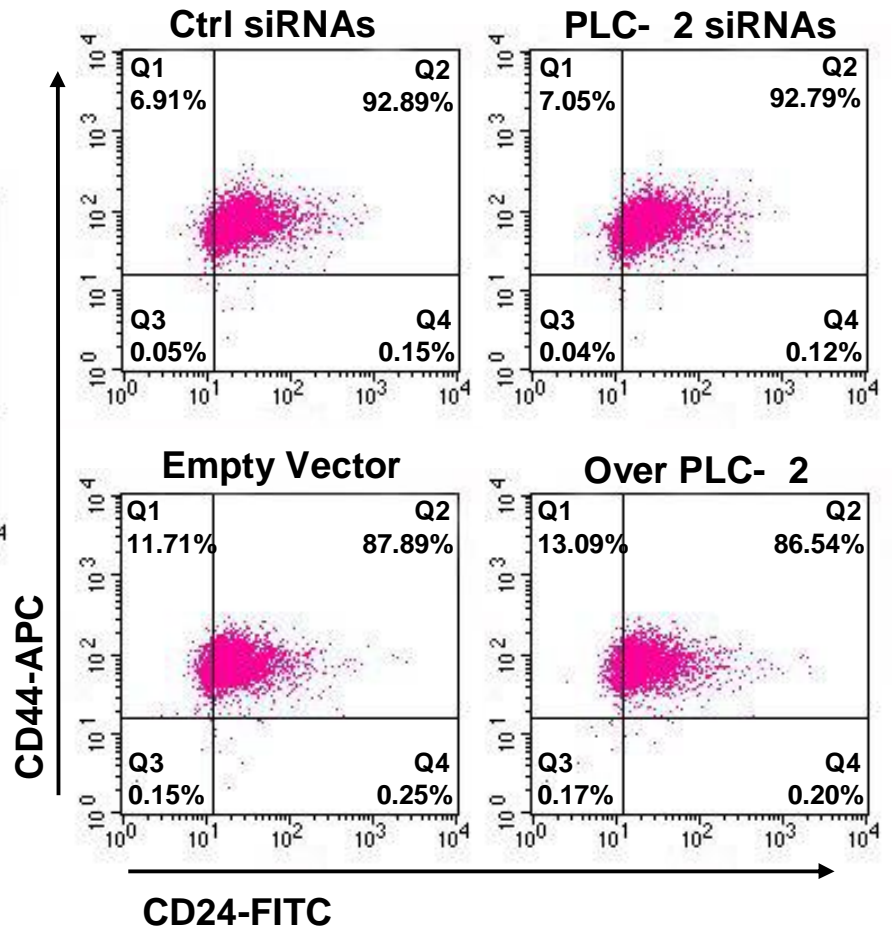**B**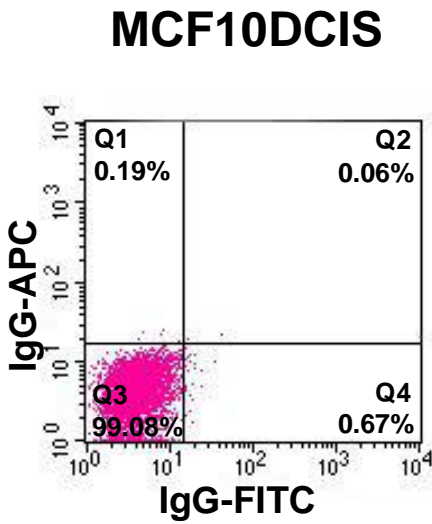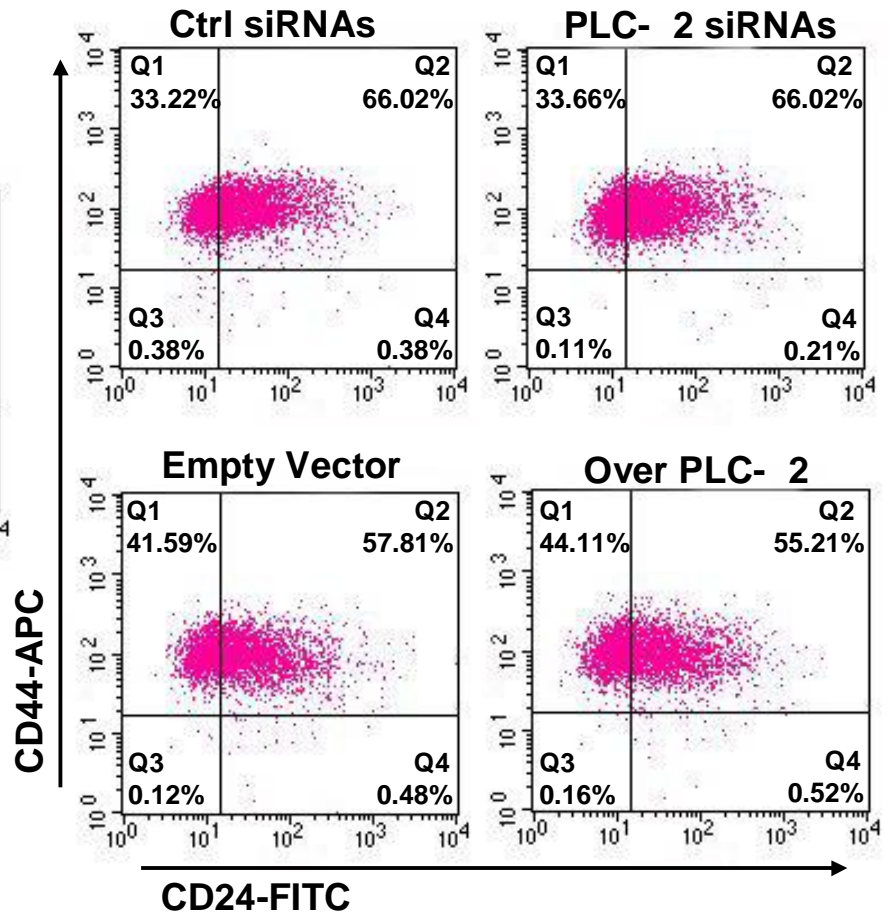

**Supplementary Figure 1.** Expression of CD44 and CD24 antigens in MCF10A and MCF10DCIS cells. MCF10A (**A**) and MCF10DCIS (**B**) cells transfected with specific siRNAs for PLC- $\gamma$ 2 (PLC- $\gamma$ 2 siRNAs) or with a construct expressing human PLC- $\gamma$ 2 (Over PLC- $\gamma$ 2) were simultaneously stained with APC-conjugated anti-CD44 and FITC-conjugated anti-CD24 antibodies and subjected to cytometrical evaluation of CD44 and CD24 expression. Data are represented on bi-parametric dot plots in which a gate, based on the negative control stained with matched isotype antibodies (on the left), was fixed to select positive cells, and the percentage of cells in all the derived quadrants is indicated. Cells in Q1 correspond to CD44<sup>+</sup>/CD24<sup>-</sup> sub-population. Non-silencing scramble siRNAs (Ctrl siRNAs) or an empty vector were used as control. All the data are the mean of three separate experiments.
