# Supplementary material for: Ectopic expression of PLC‐β2 in non‐invasive breast tumor cells plays a protective role against malignant progression and is correlated with the deregulation of miR‐146a
Source: PubMed Central journal article supplement — Mol Carcinog. 2019 Jan 16;58(5):708–21. doi: 10.1002/mc.22964 (PMC6590318; doi:10.1002/mc.22964), 2019-01-16
Supplement: MC-58-708-s002.pdf [file MC-58-708-s002.pdf]

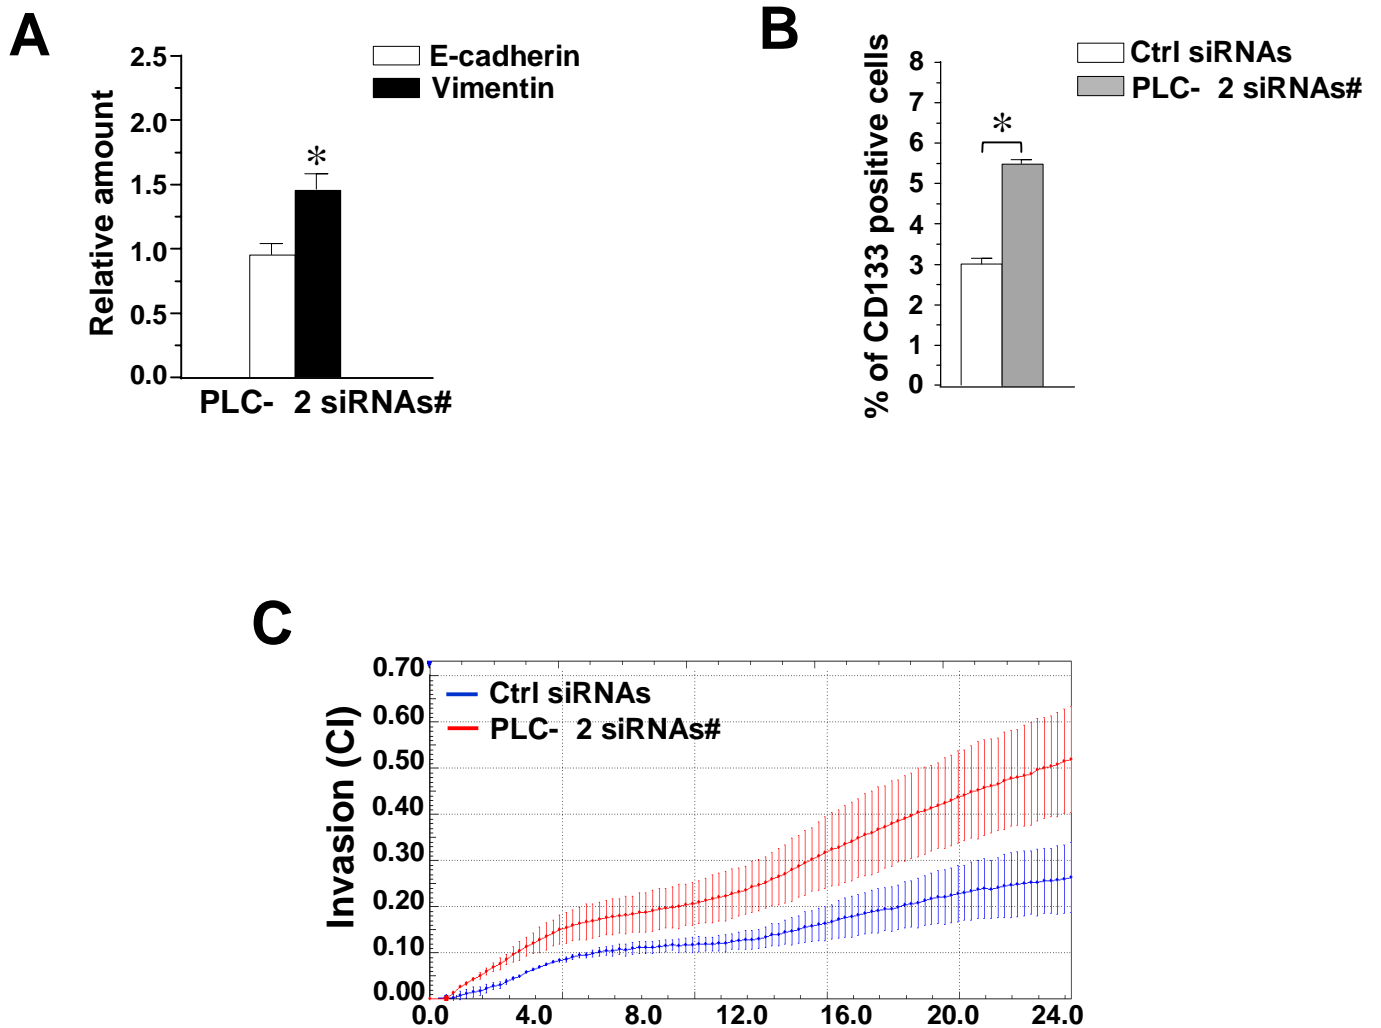

**Supplementary Figure 2.** Effects of administration of PLC-2 siRNA# to MCF10DCIS cells. In (A), relative amounts of the indicated proteins as deduced from the densitometry of Western blot bands normalized with  $\alpha$ -Tubulin, in MCF10DCIS cells transfected with siRNAs specific for PLC-2 (PLC-2 siRNAs#, Qiagen). Scramble siRNAs were used as control and taken as 1. MCF10DCIS cells, under the above reported experimental conditions were subjected to cytofluorimetric evaluation of CD133 surface expression (B) and to dynamic monitoring of invasion through Matrigel using the xCELLigence RTCA system (C). All the data are the mean of 3 separate experiments  $\pm$  SD. \* $P < 0.05$ .
