# Supplementary material for: Ectopic expression of PLC‐β2 in non‐invasive breast tumor cells plays a protective role against malignant progression and is correlated with the deregulation of miR‐146a
Source: PubMed Central journal article supplement — Mol Carcinog. 2019 Jan 16;58(5):708–21. doi: 10.1002/mc.22964 (PMC6590318; doi:10.1002/mc.22964), 2019-01-16
Supplement: MC-58-708-s003.pdf [file MC-58-708-s003.pdf]

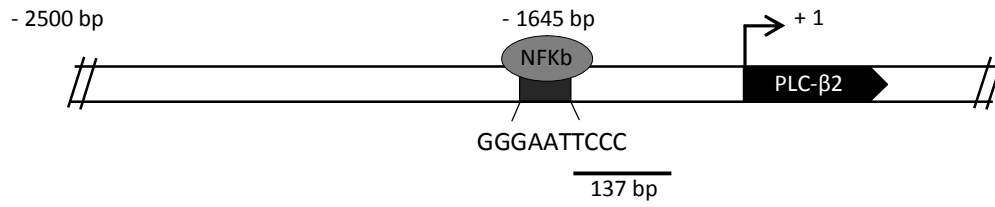

**Supplementary Figure 3.** Schematic representation of the putative NF-kB binding site located in the human PLC- 2 promoter.
