# Supplementary material for: Ectopic expression of PLC‐β2 in non‐invasive breast tumor cells plays a protective role against malignant progression and is correlated with the deregulation of miR‐146a
Source: PubMed Central journal article supplement — Mol Carcinog. 2019 Jan 16;58(5):708–21. doi: 10.1002/mc.22964 (PMC6590318; doi:10.1002/mc.22964), 2019-01-16
Supplement: MC-58-708-s004.pdf [file MC-58-708-s004.pdf]

**A**

- 1) 5'...AAGGAGGUUCAGCCCCUUCUCU...3' nt (69-90) PLC- 2 3'UTR  
 ||            | | ||||  
 3' UUGGGUACCUUAAGUCAAGAGU 5' hsa-miR-146a
- 2) 5'...UAGCAAGGAGGUUCAGCCCCU...3' nt (65-86) PLC- 2 3'UTR  
 | | | |    |||| |  
 3' UUGGGUACCUUAAGUCAAGAGU 5' hsa-miR-146a
- 3) 5'...CUGGGCCUAGAAGUCUUCUCA...3' nt (240-261) PLC- 2 3'UTR  
 |            ||||  
 3' UUGGGUACCUUAAGUCAAGAGU 5' hsa-miR-146a

**B**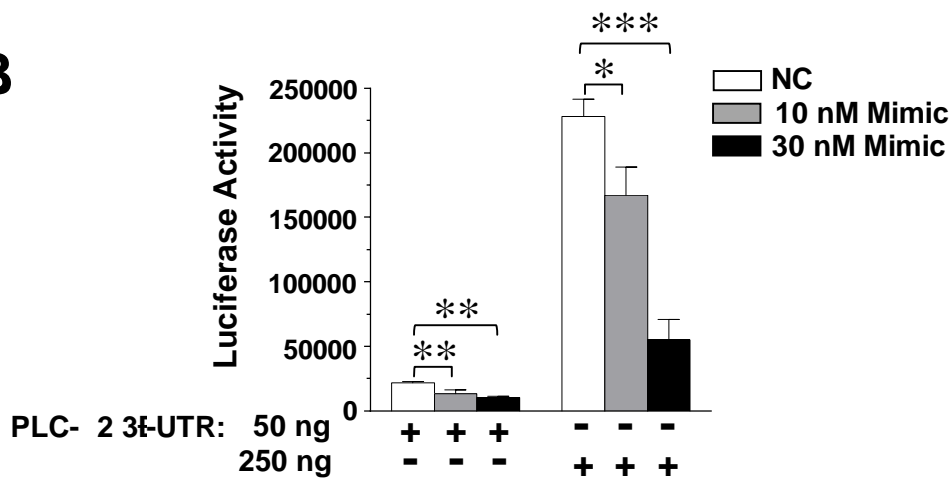

**Supplementary Figure 4.** Interaction of miR-146a with PLC- 2 mRNA in HeLa cells. **(A)** Putative binding sequences for miR-146a in 3'UTR of PLC- 2, as deduced by the use of EMBOSS Needle algorithm. The miRNA seed-sequence is underlined. **(B)** Luciferase activity, reported as RLU (Relative Light Units)/ $\mu$ g of protein, of HeLa cells co-transfected for 24 hours with 50 or 250 ng of PLC- 2 3'UTR luciferase reporter vector and with the indicated concentrations of miR-146a mimic. Values obtained with scramble miRNA sequences were used as negative control (NC). The data are the mean of three separate experiments  $\pm$  SD. \* $P$  <0.05; \*\* $P$  <0.01; \*\*\* $P$  <0.001.
